# Supplementary material
Source: HighWire-hosted journal article supplement (http://cmajopen.ca/highwire/filestream/84933/field_highwire_adjunct_files/0/2020-0166-original-submission.pdf)
Supplement: 2020-0166-original-submission.pdf [file 2020-0166-original-submission.pdf]

# The effect of comorbidity on primary care use during breast cancer chemotherapy

A population-based retrospective cohort study using CanIMPACT data

R Walsh<sup>1,2</sup> MD MSc CCFP, AK Lofters<sup>2,3</sup> MD PhD CCFP, R Moineddin<sup>4,5</sup> PhD, MK Krzyzanowska<sup>6,7</sup> MD MPH FRCPC, E Grunfeld<sup>2,8</sup> MD MSc DPhil FCFP

1. Department of Family & Community Medicine, Sunnybrook Health Sciences Centre, Toronto, Canada
2. Department of Family & Community Medicine, University of Toronto, Toronto, Canada
3. Department of Family & Community Medicine, Women's College Hospital, Toronto, Canada
4. Dalla Lana School of Public Health, University of Toronto, Toronto, Canada
5. ICES, Toronto, Canada
6. Department of Medical Oncology & Hematology, Princess Margaret Cancer Centre, University Health Network, Toronto Canada
7. Institute of Health Policy, Management and Evaluation, University of Toronto, Toronto, Canada
8. Ontario Institute for Cancer Research, Ontario, Canada

Corresponding Author:

Rachel Walsh, [rachel.walsh@sunnybrook.ca](mailto:rachel.walsh@sunnybrook.ca)

Funding Statement:

This study was supported by ICES, which is funded by an annual grant from the Ontario Ministry of Health and Long-Term Care (MOHLTC). This study is part of the Canadian Team to Improve Community-Based Cancer Care Along the Continuum (CanIMPACT), which received funding from Canadian Institutes of Health Research (CIHR). The opinions, results and conclusions reported in this paper are those of the authors and are independent from the funding sources. No endorsement by ICES or the Ontario MOHLTC is intended or should be inferred.

Competing Interests:

No competing interests to declare.

**Abstract:**

**BACKGROUND:** Breast cancer patients visit their primary care physicians (PCPs) more often during chemotherapy compared to before their breast cancer diagnosis. However, It is unclear why PCP visits increase and what the role of PCPs is during chemotherapy. We assessed the association between physical comorbidities and/or mental health history (MHH) and the change in PCP use during adjuvant breast cancer chemotherapy.

**METHODS:** We conducted a population-based, retrospective cohort study of women diagnosed with stage I-III breast cancer in Ontario during 2007-2011 who received surgery and adjuvant chemotherapy. The primary outcome was the difference in the 6-month rate of PCP visits at baseline and during treatment.

**RESULTS:** Six-month PCP visit rate increased during chemotherapy (mean 2.3 visits at baseline, 3.4 visits during chemotherapy). During treatment, the adjusted 6-month rate of PCP visits more than doubled in the lowest physical comorbidity/no MHH group compared to the baseline rate (Rate Ratio (RR) 2.52, 95%CI 2.43-2.61). This increase was lower in those with MHH (RR 1.81, 95%CI 1.68-1.96) and in the highest physical comorbidity group (RR 1.16, 95%CI 1.07-1.28).

**INTERPRETATION:** Breast cancer patients with more physical comorbidities and/or MHH have a higher frequency of PCP visits during adjuvant chemotherapy but lower absolute and relative increases in visits compared to baseline. This could be due to a ceiling effect. Primary care providers can expect to see their patients with fewer physical comorbidities and/or no MHH more often during chemotherapy. It is therefore important for PCPs to be prepared to provide breast cancer-related care during chemotherapy.

**Keywords:** breast neoplasms, primary health care, population health

## The effect of comorbidity on primary care use during breast cancer chemotherapy

A population-based retrospective cohort study using CanIMPACT data

### Introduction:

Breast cancer is the most commonly diagnosed cancer among women worldwide and the second most common cause of cancer death for women in developed regions of the world,(1) including Canada.(2) In 2018, just under 12,000 women were diagnosed with breast cancer in Ontario alone.(3) Treatment for breast cancer often involves surgery and sometimes includes adjuvant chemotherapy (given after surgery) in order to reduce the risk of recurrence. In 2007 to 2012, 76% of Canadian women with stages I-III breast cancer received surgical treatment, and in Ontario, 43.4% of these women also received adjuvant chemotherapy.(4)

Breast cancer patients frequently visit their primary care physicians (PCPs) during the course of their cancer journey.(5) A PCP can expect to see an average of one new case of breast cancer in their practice in any given year.(6) While the role of PCPs during prevention, screening, diagnosis, survivorship and end-of-life care has been relatively well-established, the role of PCPs during breast cancer treatment is less clear.(6)

Despite the lack of a clear role for PCPs during breast cancer treatment, breast cancer patients have been shown to visit their PCPs more often when they are receiving adjuvant chemotherapy compared to before their breast cancer diagnosis.(7-9)The reasons for this remain unclear. Previous qualitative work with providers suggests that PCPs' main roles in caring for cancer patients are not to manage urgent issues during chemotherapy, but rather to coordinate care, manage comorbidities and provide psychosocial care.(10) It is possible, then, that breast cancer patients see their PCPs more often

1  
2  
3 while they are undergoing chemotherapy due to increased concerns related to management of the  
4  
5 patients' physical and/or mental comorbidities during this time.  
6  
7

8 In our study, we aimed to determine how physical and/or mental comorbidity affect the increase in  
9  
10 PCP use during adjuvant breast cancer chemotherapy. We hypothesized that patients with high levels of  
11  
12 physical and/or mental comorbidity would show the greatest increases in PCP use during adjuvant  
13  
14 chemotherapy.  
15  
16  
17  
18  
19  
20

## 21 **Methods:**

### 22 Study design

23  
24  
25 We performed a population-based, retrospective cohort study using linked provincial-level  
26  
27 administrative health databases housed at ICES.(11) This study was performed on the Ontario cohort of  
28  
29 a larger, nationwide cohort study (the Canadian Team to Improve Community-Based Cancer Care along  
30  
31 the Continuum – CanIMPACT).(12) Approval was received from the University of Toronto research ethics  
32  
33 board.  
34  
35  
36  
37  
38

### 39 Study population

40  
41 We included women over 18 years of age diagnosed with stage I-III breast cancer from Jan 1,  
42  
43 2007 to Dec 31, 2011 (to allow for at least 5 full years of follow-up data used in other CanIMPACT  
44  
45 studies (13,14)) who underwent potentially curative surgery and adjuvant chemotherapy. We excluded  
46  
47 patients who had a previous history of cancer, were diagnosed with a new primary cancer within 14  
48  
49 months of breast cancer diagnosis, had received neoadjuvant chemotherapy, had received radiation  
50  
51 therapy prior to adjuvant chemotherapy, or were living in a long-term care (LTC) facility at diagnosis.  
52  
53  
54  
55  
56  
57

### Variables and data sources

For our main outcome variable, we examined the difference in the 6-month rate of PCP visits during a 24-month baseline period (the 6 to 30 months before diagnosis) and the 6-month treatment period (6 months from the start of adjuvant chemotherapy). Visits that took place in emergency department or inpatient locations were excluded. Diagnostic codes were noted. Visits were considered cancer-related if the diagnostic code was listed as female or male breast neoplasm, other malignant neoplasm, breast carcinoma in situ, or adverse drug effect.

Our main predictor variables were physical comorbidity and/or mental health history (MHH). We determined physical comorbidity level using the Johns Hopkins Aggregated Diagnosis Groups (ADGs)(15) and excluding psychosocial ADGs. ADGs are groups of similar conditions based on characteristics such as condition duration, severity, and specialty care involvement.(16) We categorized physical comorbidity into low (0-5 ADGs), medium (6-9 ADGs), and high (10+ ADGs) levels, similar to a previous CanIMPACT study.(17) We determined MHH by whether a patient had any PCP visits during the baseline period associated with previously-validated mental health diagnostic codes.(18)

Variables considered potential confounders in our study included age at diagnosis, immigration status (non-immigrants were classified as long-term residents who are Canadian-born citizens or immigrants arriving to Canada prior to 1985), income quintile based on neighbourhood income, rurality, regional health district (one of fourteen Local Health Integration Networks (LHINs) in Ontario), primary care continuity, and primary care practice type. Primary care continuity was measured using the Usual Provider of Care (UPC) index:(19) the proportion of visits to the most-often-visited PCP during the 2-year baseline interval, for patients with at least 3 visits to any PCP during that interval. As such, continuity of primary care was divided into the following categories: 0 PCP visits, 1-2 PCP visits, low continuity (UPC  $\leq 0.75$ ) and high continuity (UPC  $> 0.75$ ). Primary care practice type was determined by enrollment in a particular funding model at the time of diagnosis ('team-based capitation' for inter-professional teams

1  
2  
3 with physicians paid primarily by capitation, 'enhanced fee-for-service (FFS)' paid primarily by FFS with  
4 some capitation, 'capitation', 'straight FFS' for those not enrolled in a primary care model, and 'other').

5  
6  
7 Databases used to obtain data elements are shown in Appendix A.  
8  
9

### 10 Statistical analysis

11  
12  
13 We used Wilcoxon rank sum tests and Kruskal-Wallis analysis of variance to compare mean  
14 ranks of PCP visit rates across patient characteristics. We used difference-in-difference methodology  
15 (20) to examine the difference in the change of PCP visit rates between baseline and treatment periods  
16 across physical comorbidity and MHH groups. We included potential confounders in a multivariable  
17 negative binomial regression analysis using generalized estimating equations (GEE) with unstructured  
18 covariance to account for repeated measures. We included an offset term in our negative binomial  
19 model to account for differences in the exposure time of the baseline and treatment periods. All  
20 analyses were performed using SAS software, version 9.4.(21) A p-value of less than 0.05 was considered  
21 statistically significant.  
22  
23  
24  
25  
26  
27  
28  
29  
30  
31  
32  
33  
34  
35  
36  
37  
38  
39

### 40 **Results:**

41 Our cohort consisted of 12,781 women (Table 1). Those in the higher physical comorbidity groups  
42 were more likely to be older, live in urban areas, be immigrants, have low continuity of care, be in an  
43 enhanced FFS model, and have a MHH. Those with a MHH were more likely to be younger, live in urban  
44 areas, be non-immigrants, be in an enhanced FFS model, and have a higher number of physical  
45 comorbidities. There were 42 participants (0.3%) with missing values for at least one demographic  
46 characteristics. These were treated as missing completely at random.  
47  
48  
49  
50  
51  
52  
53  
54  
55  
56  
57  
58  
59  
60

1  
2  
3 The mean number of PCP visits at baseline was 0.39 visits per month (2.34 visits over 6 months)  
4 (figure 1). The mean number of PCP visits during treatment was 0.56 visits per month (3.36 visits over 6  
5  
6 months).  
7  
8  
9

10 Approximately 6% of patients did not see any PCP at baseline. During treatment, this proportion  
11 increased to 15%. There were 247 (1.9%) patients who had no PCP visits at baseline or during treatment.  
12  
13 Despite this, overall PCP visit rates increased from baseline to treatment periods across all groups of  
14  
15 baseline characteristics (mean 6-month PCP visit increase of 1.0) (table 2). The greatest increases in PCP  
16  
17 visit rates from baseline to treatment occurred in those with <3 PCP visits at baseline, and those living in  
18  
19 remote or very remote rural locations (mean 6-month visit increase of 1.8-2.9).  
20  
21  
22  
23

24 Those with higher physical comorbidity level/MHH had higher PCP visit rates during both baseline  
25 and treatment compared to low physical comorbidity/no MHH groups (6-month PCP visit rates higher by  
26  
27 4.2/1.7 at baseline and 2.5/1.1 during treatment); however, the absolute increases in PCP visit rates in  
28  
29 the high physical comorbidity/MHH groups were less than those with low physical comorbidity/no MHH  
30  
31 (mean increases lower by 1.6/0.6 PCP visits per 6 months) (table 2).  
32  
33  
34  
35

36 In our multivariable model (figure 2, detailed results in appendix B), we found that, during  
37 treatment, the adjusted 6-month PCP visit rate more than doubled in the lowest physical comorbidity  
38 and no MHH group compared to the baseline rate (RR 2.52, 95% CI 2.43-2.61). Having a MHH was  
39 associated with a lower increase in PCP visits during the treatment period (RR 1.81, 95% CI 1.68-1.96).  
40  
41 Those in the highest physical comorbidity group demonstrated an even lower increase in PCP visits (RR  
42  
43 1.16, 95% CI 1.07-1.28).  
44  
45  
46  
47  
48  
49

50 Patients were seen by their PCPs during the baseline and treatment periods for various reasons  
51 (table 4). Prior to their breast cancer diagnosis, patients most often saw their PCP for hypertension,  
52  
53 anxiety, annual health examinations, upper respiratory tract infections and diabetes. During adjuvant  
54  
55  
56  
57

1  
2  
3 chemotherapy, patients most often saw their PCP for breast cancer-related concerns, with other  
4 reasons remaining similar to their pre-diagnosis visits. Breast cancer-related concerns made up 39.6% of  
5 PCP visits during treatment (28.8% in the high physical comorbidity group, and 45.9% in the low physical  
6 comorbidity group). Adding anxiety as a breast cancer-related concern increased this proportion to  
7 45.9% (35.7% in the high physical comorbidity group, and 51.6% in the low comorbidity group).  
8  
9  
10  
11  
12  
13  
14  
15  
16  
17

### 18 **Interpretation:**

20  
21 Our study is the first to examine the effect of physical comorbidity and MHH on the change in PCP  
22 visits during breast cancer treatment. Similar to previous studies,(7-9) in this population-based cohort of  
23 women in Ontario with breast cancer, we found that the absolute number of PCP visits over 6 months  
24 increased from 2.3 at baseline to 3.4 during adjuvant chemotherapy. In our adjusted analyses, we found  
25 that, while women with high physical comorbidity and/or MHH had more visits during baseline and  
26 treatment periods, the increase in PCP visits from baseline to treatment periods was lower than those  
27 with low physical comorbidity and/or no MHH.  
28  
29  
30  
31  
32  
33  
34  
35  
36

37 Our findings could be due to a “ceiling effect” – where those with high physical comorbidity  
38 and/or MHH already had a relatively saturated number of PCP visits at baseline with little room for  
39 increasing visits during the treatment period. Alternatively, those with a low number of PCP visits at  
40 baseline, who are more likely to be those with low comorbidity levels, may be less familiar with the  
41 healthcare system and require more PCP visits during treatment for care coordination and navigation.  
42 Several studies have shown that physical and mental comorbidities increase after breast cancer  
43 diagnosis.(22-26) Therefore, another reason for this association could be that those with low physical  
44 comorbidity and/or no MHH at baseline develop more comorbidities and/or mental health issues, or  
45 have more of these issues identified, during chemotherapy, which would require additional primary care  
46  
47  
48  
49  
50  
51  
52  
53  
54  
55  
56  
57



1  
2  
3 management. Future research should examine how increasing comorbidity after breast cancer diagnosis  
4 might influence PCP visits during treatment.  
5  
6

7  
8  
9           However, our results need to be interpreted in light of several possible limitations. First,  
10 physician billings data do not provide detailed clinical information for PCP visits. While we identified the  
11 number of visits with a breast cancer diagnostic code, future research should examine the details of  
12 these visits in order to identify the specific issues during chemotherapy that are being addressed by  
13 PCPs. Second, the CanIMPACT cohort used in this study involved patients diagnosed from 2007 to 2011.  
14 While the principles of breast cancer treatment have not dramatically changed since 2011,(27) and no  
15 major primary care reform has occurred in Ontario since then,(28) we need to consider that trends in  
16 PCP visits during chemotherapy may have shifted since these patients were treated.  
17  
18  
19  
20  
21  
22  
23  
24  
25  
26

27           Overall, PCPs can expect breast cancer patients to have one additional visit over six months after  
28 starting adjuvant chemotherapy compared to their baseline rate. PCPs can plan for their patients with  
29 high physical comorbidity and/or MHH to continue having appointments at a high rate while they  
30 undergo chemotherapy and they can expect their patients with low physical comorbidity and/or no  
31 MHH to increase the frequency of their visits during chemotherapy, with forty percent of these visits  
32 being related to their breast cancer diagnosis. It is therefore important for PCPs to be aware of, and be  
33 able to provide management strategies for, issues that may arise during chemotherapy.  
34  
35  
36  
37  
38  
39  
40  
41  
42  
43

44           One way to help PCPs in managing issues during chemotherapy is to implement shared care  
45 initiatives between PCPs and oncologists. For example, faxing chemotherapy information to PCPs can  
46 increase PCP confidence in managing chemotherapy effects.(29) Additionally, CanIMPACT has launched  
47 a trial of eOncoNote, an asynchronous communications tool imbedded within the larger eConsult  
48 platform,(30) aimed at improving communication between PCPs and oncologists.(31) Incorporating  
49  
50  
51  
52  
53  
54  
55  
56  
57

1  
2  
3 these or other interventions to improve shared care during chemotherapy can assist PCPs in managing  
4  
5 the increased visits during this time.  
6  
7  
8  
9  
10

### 11 12 13 **Acknowledgements:** 14

15  
16  
17 This study was funded by the Canadian Institutes of Health Research (CIHR; grant 128272). This study is  
18  
19 supported by ICES, which is funded by an annual grant from the Ontario Ministry of Health and Long-  
20  
21 Term Care. The opinions, results, and conclusions reported in this paper are those of the authors and are  
22  
23 independent from the funding sources. No endorsement by ICES or the Ontario Ministry of Health and  
24  
25 Long-Term Care is intended or should be inferred. Parts of this material are based on data and  
26  
27 information provided by Ontario Health (Cancer Care Ontario (CCO)). The opinions, results, views, and  
28  
29 conclusions reported in this paper are those of the authors and do not necessarily reflect those of CCO.  
30  
31 No endorsement by CCO is intended or should be inferred. Parts of this material are based on data and  
32  
33 information compiled and provided by CIHI. However, the analyses, conclusions, opinions, and  
34  
35 statements expressed herein are those of the authors and not necessarily those of CIHI. All inferences,  
36  
37 opinions, and conclusions drawn in this paper are those of the authors, and do not reflect the opinions  
38  
39 or policies of the data stewards. The authors would like to acknowledge the work of Patti Groome and  
40  
41 the quantitative team of CanIMPACT who created the initial cohort and whose work helped shape the  
42  
43 methods used in this study, as well as Marlo Whitehead, ICES analyst, for her efficiency and expertise in  
44  
45 managing the ICES datasets.  
46  
47  
48  
49  
50  
51  
52  
53  
54  
55  
56  
57

## References

- (1) Ferlay J, Soerjomataram I, Dikshit R, Eser S, Mathers C, Rebelo M, et al. Cancer incidence and mortality worldwide: sources, methods and major patterns in GLOBOCAN 2012. *Int J Cancer* 2015 Mar 1;136(5):E359-86.
- (2) Canadian Cancer Society's Advisory Committee on Cancer Statistics. ,Canadian Cancer Statistics 2017. 2017.
- (3) Cancer Care Ontario. Ontario Cancer Statistics 2018 Report. 2018.
- (4) Powis M, Groome P, Biswanger N, Kendell C, Decker KM, Grunfeld E, et al. Cross-Canada differences in early-stage breast cancer treatment and acute-care use. *Curr Oncol* 2019 Oct;26(5):e624-e639.
- (5) Del Giudice L, Bondy SJ, Chen Z, Maaten S. Physician Care of Cancer Patients. In: Jaakkimainen L, Upshur REG, Klein-Geltink JE, Leong A, Maaten S, Schultz SE, et al, editors. Primary Care in Ontario: ICES Atlas Toronto, ON: the Institute for Clinical Evaluative Sciences (ICES); 2006. p. 161-174.
- (6) Rubin G, Berendsen A, Crawford SM, Dommert R, Earle C, Emery J, et al. The expanding role of primary care in cancer control. *Lancet Oncol* 2015 Sep;16(12):1231-1272.
- (7) Jiang L, Lofters A, Moineddin R, Decker K, Groome P, Kendell C, et al. Primary care physician use across the breast cancer care continuum: CanIMPACT study using Canadian administrative data. *Can Fam Physician* 2016 Oct;62(10):e589-e598.
- (8) Bastedo SJ, Krzyzanowska MK, Moineddin R, Yun L, Enright KA, Grunfeld E. A population-based assessment of primary care visits during adjuvant chemotherapy for breast cancer. *Curr Oncol* 2017 Apr;24(2):90-94.
- (9) Decker K, Moineddin R, Kendell C, Urquhart R, Biswanger N, Groome P, et al. Changes in primary care provider utilization by phase of care for women diagnosed with breast cancer: a CanIMPACT longitudinal cohort study. *BMC Fam Pract* 2019 Nov 21;20(1):161-019-1052-2.
- (10) Easley J, Miedema B, O'Brien MA, Carroll J, Manca D, Webster F, et al. The role of family physicians in cancer care: perspectives of primary and specialty care providers. *Curr Oncol* 2017 Apr;24(2):75-80.
- (11) ICES. Working with ICES data. 2019; Available at: <https://www.ices.on.ca/Data-and-Privacy/ICES-data/Working-with-ICES-Data>. Accessed 07/04, 2019.
- (12) Grunfeld E. It takes a team: CanIMPACT: Canadian Team to Improve Community-Based Cancer Care along the Continuum. *Can Fam Physician* 2016 Oct;62(10):781-782.

- 1  
2  
3 (13) Kendell C, Decker KM, Groome PA, McBride ML, Jiang L, Krzyzanowska MK, et al. Use of physician  
4 services during the survivorship phase: a multi-province study of women diagnosed with breast cancer.  
5 *Curr Oncol* 2017 Apr;24(2):81-89.  
6
- 7 (14) McBride ML, Groome PA, Decker K, Kendell C, Jiang L, Whitehead M, et al. Adherence to quality  
8 breast cancer survivorship care in four Canadian provinces: a CanIMPACT retrospective cohort study.  
9 *BMC Cancer* 2019 Jul 4;19(1):659-019-5882-z.  
10
- 11 (15) Starfield B, Weiner J, Mumford L, Steinwachs D. Ambulatory care groups: a categorization of  
12 diagnoses for research and management. *Health Serv Res* 1991 Apr;26(1):53-74.  
13
- 14 (16) Austin PC, van Walraven C, Wodchis WP, Newman A, Anderson GM. Using the Johns Hopkins  
15 Aggregated Diagnosis Groups (ADGs) to predict mortality in a general adult population cohort in  
16 Ontario, Canada. *Med Care* 2011 Oct;49(10):932-939.  
17
- 18 (17) Lofters AK, McBride ML, Li D, Whitehead M, Moineddin R, Jiang L, et al. Disparities in breast cancer  
19 diagnosis for immigrant women in Ontario and BC: results from the CanIMPACT study. *BMC Cancer* 2019  
20 Jan 9;19(1):42-018-5201-0.  
21
- 22 (18) Steele LS, Glazier RH, Lin E, Evans M. Using administrative data to measure ambulatory mental  
23 health service provision in primary care. *Med Care* 2004 Oct;42(10):960-965.  
24
- 25 (19) Breslau N, Reeb KG. Continuity of care in a university-based practice. *J Med Educ* 1975  
26 Oct;50(10):965-969.  
27
- 28 (20) Warton ME, Parker MM, Karter AJ. How D-I-D you do that? Basic Difference-in-Differences Models  
29 in SAS®. 2016.  
30
- 31 (21) SAS Institute Inc. SAS 9.4. 2013.  
32
- 33 (22) Nakash O, Levav I, Aguilar-Gaxiola S, Alonso J, Andrade LH, Angermeyer MC, et al. Comorbidity of  
34 common mental disorders with cancer and their treatment gap: findings from the World Mental Health  
35 Surveys. *Psychooncology* 2014 Jan;23(1):40-51.  
36
- 37 (23) Ng HS, Vitry A, Koczwara B, Roder D, McBride ML. Patterns of comorbidities in women with breast  
38 cancer: a Canadian population-based study. *Cancer Causes Control* 2019 Jul 6.  
39
- 40 (24) Loh KY, Ng T, Lee CP, Ng R, Chan A. Medication use by early-stage breast cancer survivors: a 1-year  
41 longitudinal study. *Support Care Cancer* 2016 Apr;24(4):1639-1647.  
42
- 43 (25) Jafari A, Goudarzian AH, Bagheri Nesami M. Depression in Women with Breast Cancer: A Systematic  
44 Review of Cross-Sectional Studies in Iran. *Asian Pac J Cancer Prev* 2018 Jan 27;19(1):1-7.  
45
- 46 (26) Jones SM, Rosenberg D, Ludman E, Arterburn D. Medical comorbidity and psychotropic medication  
47 fills in older adults with breast or prostate cancer. *Support Care Cancer* 2015 Oct;23(10):3005-3009.  
48
- 49 (27) Waks AG, Winer EP. Breast Cancer Treatment: A Review. *JAMA* 2019 Jan 22;321(3):288-300.  
50  
51  
52  
53  
54  
55  
56  
57  
58  
59  
60

1  
2  
3 (28) Marchildon GP, Hutchison B. Primary care in Ontario, Canada: New proposals after 15 years of  
4 reform. Health Policy 2016 Jul;120(7):732-738.  
5

6  
7 (29) Jefford M, Baravelli C, Dudgeon P, Dabscheck A, Evans M, Moloney M, et al. Tailored chemotherapy  
8 information faxed to general practitioners improves confidence in managing adverse effects and  
9 satisfaction with shared care: results from a randomized controlled trial. J Clin Oncol 2008 May  
10 10;26(14):2272-2277.  
11

12 (30) Liddy C, Joschko J, Guglani S, Afkham A, Keely E. Improving Equity of Access Through Electronic  
13 Consultation: A Case Study of an eConsult Service. Frontiers in Public Health 2019;7(279).  
14

15 (31) CanIMPACT. Intervention Study. 2019; Available at: [https://canimpact.utoronto.ca/streams-and-](https://canimpact.utoronto.ca/streams-and-themes/intervention-study/)  
16 [themes/intervention-study/](https://canimpact.utoronto.ca/streams-and-themes/intervention-study/). Accessed Nov/04, 2019.  
17  
18  
19  
20  
21  
22  
23  
24  
25  
26  
27  
28  
29  
30  
31  
32  
33  
34  
35  
36  
37  
38  
39  
40  
41  
42  
43  
44  
45  
46  
47  
48  
49  
50  
51  
52  
53  
54  
55  
56  
57  
58  
59  
60

Confidential

Table 1. Physical and mental comorbidity levels stratified by cohort characteristics

|                                          | Total<br>N= 12,781 | Physical Co-morbidity Level   |                                  |                                | P<br>value | Mental Comorbidity      |                       | P<br>value |
|------------------------------------------|--------------------|-------------------------------|----------------------------------|--------------------------------|------------|-------------------------|-----------------------|------------|
|                                          |                    | 0-5 ADGs<br>(low)<br>N= 7,287 | 6-9 ADGs<br>(medium)<br>N= 4,425 | 10+ ADGs<br>(high)<br>N= 1,069 |            | Yes<br>N=4,127          | No<br>N=8,654         |            |
| <b>Age at diagnosis<br/>(years)</b>      |                    |                               |                                  |                                |            |                         |                       |            |
| <40                                      | 1,102<br>(8.6%)    | 639 (8.8%)                    | 374<br>(8.5%)                    | 89 (8.3%)                      | <0.001     | 349<br>(8.5%)           | 753<br>(8.7%)         | 0.008      |
| 40-49                                    | 3,481<br>(27.2%)   | 2,177<br>(29.9%)              | 1,092<br>(24.7%)                 | 212<br>(19.8%)                 |            | 1,134<br>(27.5%)        | 2,347<br>(27.1%)      |            |
| 50-59                                    | 4,225<br>(33.1%)   | 2,500<br>(34.3%)              | 1,417<br>(32.0%)                 | 308<br>(28.8%)                 |            | 1,404<br>(34.0%)        | 2,821<br>(32.6%)      |            |
| 60-69                                    | 3,045<br>(23.8%)   | 1,581<br>(21.7%)              | 1,155<br>(26.1%)                 | 309<br>(28.9%)                 |            | 985<br>(23.9%)          | 2,060<br>(23.8%)      |            |
| 70-74                                    | 607 (4.7%)         | 262 (3.6%)                    | 239<br>(5.4%)                    | 106 (9.9%)                     |            | 180<br>(4.4%)           | 427<br>(4.9%)         |            |
| >74                                      | 321 (2.5%)         | 128 (1.8%)                    | 148<br>(3.3%)                    | 45 (4.2%)                      |            | 75 (1.8%)               | 246<br>(2.8%)         |            |
| <b>Urban/rural<br/>Residence</b>         |                    |                               |                                  |                                |            |                         |                       |            |
| Urban                                    | 11,189<br>(87.5%)  | 6,254<br>(85.8%)              | 3,957<br>(89.4%)                 | 978<br>(91.5%)                 | <0.001     | 3,677<br>(89.1%)        | 7,512<br>(86.8%)      | 0.06       |
| Rural                                    | 699 (5.5%)         | 450 (6.2%)                    | 213<br>(4.8%)                    | 36 (3.4%)                      |            | 199<br>(4.8%)           | 500<br>(5.8%)         |            |
| Rural-remote                             | 596 (4.7%)         | 392 (5.4%)                    | 168<br>(3.8%)                    | 36 (3.4%)                      |            | 170<br>(4.1%)           | 426<br>(4.9%)         |            |
| Rural-very remote                        | 292-297<br>(2.3%)  | 187-192<br>(2.6%)             | 85-90<br>(1.9-2.0%)              | 15-20 (1.4-<br>1.9%)           |            | 80-85<br>(1.9-<br>2.1%) | 210-215<br>(2.4-2.5%) |            |
| Rural-unknown                            | *                  | *                             | *                                | *                              |            | *                       | *                     |            |
| Unknown                                  | *                  | *                             | *                                | *                              |            | *                       | *                     |            |
| <b>Immigration Status</b>                |                    |                               |                                  |                                |            |                         |                       |            |
| Long-term residents                      | 11,075<br>(86.7%)  | 6,384<br>(87.6%)              | 3,775<br>(85.3%)                 | 916<br>(85.7%)                 | 0.001      | 3,636<br>(88.1%)        | 7,439<br>(86.0%)      | <0.001     |
| Immigrants                               | 1,706<br>(13.3%)   | 903<br>(12.4%)                | 650<br>(14.7%)                   | 153<br>(14.3%)                 |            | 491<br>(11.9%)          | 1,215<br>(14.0%)      |            |
| <b>Neighbourhood<br/>Income Quintile</b> |                    |                               |                                  |                                | 0.073      |                         |                       | 0.09       |
| 1 (lowest)                               | 2,020<br>(15.8%)   | 1,121<br>(15.4%)              | 705<br>(15.9%)                   | 194<br>(18.1%)                 |            | 685<br>(16.6%)          | 1,335<br>(15.4%)      |            |
| 2                                        | 2,384<br>(18.7%)   | 1,376<br>(18.9%)              | 792<br>(17.9%)                   | 216<br>(20.2%)                 |            | 786<br>(19.0%)          | 1,598<br>(18.5%)      |            |

|                                        | Total<br>N= 12,781 | Physical Co-morbidity Level   |                                  |                                | P<br>value | Mental Comorbidity |                  | P<br>value |
|----------------------------------------|--------------------|-------------------------------|----------------------------------|--------------------------------|------------|--------------------|------------------|------------|
|                                        |                    | 0-5 ADGs<br>(low)<br>N= 7,287 | 6-9 ADGs<br>(medium)<br>N= 4,425 | 10+ ADGs<br>(high)<br>N= 1,069 |            | Yes<br>N=4,127     | No<br>N=8,654    |            |
| 3                                      | 2,523<br>(19.7%)   | 1,433<br>(19.7%)              | 879-883<br>(20.0%)               | 207-211<br>(19.4-<br>19.7%)    |            | 839<br>(20.3%)     | 1,684<br>(19.5%) |            |
| 4                                      | 2,819<br>(22.1%)   | 1,598<br>(21.9%)              | 980<br>(22.1%)                   | 241<br>(22.5%)                 |            | 867<br>(21.0%)     | 1,952<br>(22.6%) |            |
| 5 (highest)                            | 2,994<br>(23.4%)   | 1,733<br>(23.8%)              | 1,051<br>(23.8%)                 | 210<br>(19.6%)                 |            | 934<br>(22.6%)     | 2,060<br>(23.8%) |            |
| Unknown                                | 41 (0.3%)          | 26 (0.4%)                     | 10-15<br>(0.2-0.3%)              | *                              |            | 16 (0.4%)          | 25 (0.3%)        |            |
| <b>Baseline Continuity of Care</b>     |                    |                               |                                  |                                |            |                    |                  |            |
| 0 visit                                | 800 (6.3%)         | 788<br>(10.8%)                | 7-12 (0.2-<br>0.3%)              | *                              | <0.001     | 18 (0.4%)          | 782<br>(9.0%)    | <0.001     |
| 1-2 visits                             | 1,536<br>(12.0%)   | 1,472<br>(20.2%)              | 59-64<br>(1.3-1.4%)              | *                              |            | 149<br>(3.6%)      | 1,387<br>(16.0%) |            |
| UPC<=0.75 (low)                        | 3,914<br>(30.6%)   | 1,773<br>(24.3%)              | 1,661<br>(37.5%)                 | 480<br>(44.9%)                 |            | 1,486<br>(36.0%)   | 2,428<br>(28.1%) |            |
| UPC>0.75 (high)                        | 6,531<br>(51.1%)   | 3,254<br>(44.7%)              | 2,695<br>(60.9%)                 | 582<br>(54.4%)                 |            | 2,474<br>(59.9%)   | 4,057<br>(46.9%) |            |
| <b>Primary Care Practice Model</b>     |                    |                               |                                  |                                |            |                    |                  |            |
| Straight FFS                           | 1,887<br>(14.8%)   | 1,193<br>(16.4%)              | 568<br>(12.8%)                   | 126<br>(11.8%)                 | <0.001     | 562<br>(13.6%)     | 1,325<br>(15.3%) | <0.001     |
| Enhanced FFS                           | 6,281<br>(49.1%)   | 3,212<br>(44.1%)              | 2,394<br>(54.1%)                 | 675<br>(63.1%)                 |            | 2,213<br>(53.6%)   | 4,068<br>(47.0%) |            |
| Capitation                             | 2,235<br>(17.5%)   | 1,326<br>(18.2%)              | 763<br>(17.2%)                   | 146<br>(13.7%)                 |            | 714<br>(17.3%)     | 1,521<br>(17.6%) |            |
| Team-based capitation                  | 2,206<br>(17.3%)   | 1,434<br>(19.7%)              | 658<br>(14.9%)                   | 114<br>(10.7%)                 |            | 608<br>(14.7%)     | 1,598<br>(18.5%) |            |
| Other                                  | 172 (1.3%)         | 122 (1.7%)                    | 42 (0.9%)                        | 8 (0.7%)                       |            | 30 (0.7%)          | 142<br>(1.6%)    |            |
| <b>Regional health district (LHIN)</b> |                    |                               |                                  |                                |            |                    |                  |            |
| Erie St. Clair                         | 713 (5.6%)         | 396 (5.4%)                    | 256<br>(5.8%)                    | 61 (5.7%)                      |            | 259<br>(6.3%)      | 454<br>(5.2%)    |            |
| South West                             | 992 (7.8%)         | 623 (8.5%)                    | 302<br>(6.8%)                    | 67 (6.3%)                      |            | 312<br>(7.6%)      | 680<br>(7.9%)    |            |
| Waterloo Wellington                    | 654 (5.1%)         | 436 (6.0%)                    | 188<br>(4.2%)                    | 30 (2.8%)                      |            | 180<br>(4.4%)      | 474<br>(5.5%)    |            |

|                                     | Total<br>N= 12,781 | Physical Co-morbidity Level   |                                  |                                | P<br>value | Mental Comorbidity        |                       | P<br>value |
|-------------------------------------|--------------------|-------------------------------|----------------------------------|--------------------------------|------------|---------------------------|-----------------------|------------|
|                                     |                    | 0-5 ADGs<br>(low)<br>N= 7,287 | 6-9 ADGs<br>(medium)<br>N= 4,425 | 10+ ADGs<br>(high)<br>N= 1,069 |            | Yes<br>N=4,127            | No<br>N=8,654         |            |
| Hamilton Niagara<br>Haldimand Brant | 1,468<br>(11.5%)   | 906<br>(12.4%)                | 471<br>(10.6%)                   | 91 (8.5%)                      |            | 454<br>(11.0%)            | 1,014<br>(11.7%)      |            |
| Central West                        | 543 (4.2%)         | 248 (3.4%)                    | 226<br>(5.1%)                    | 69 (6.5%)                      |            | 180<br>(4.4%)             | 363<br>(4.2%)         |            |
| Mississauga Halton                  | 750 (5.9%)         | 393 (5.4%)                    | 273<br>(6.2%)                    | 84 (7.9%)                      |            | 226<br>(5.5%)             | 524<br>(6.1%)         |            |
| Toronto Central                     | 1,061<br>(8.3%)    | 554 (7.6%)                    | 405<br>(9.2%)                    | 102 (9.5%)                     |            | 398<br>(9.6%)             | 663<br>(7.7%)         |            |
| Central                             | 1,784<br>(14.0%)   | 886<br>(12.2%)                | 712<br>(16.1%)                   | 186<br>(17.4%)                 |            | 550<br>(13.3%)            | 1,234<br>(14.3%)      |            |
| Central East                        | 1,710<br>(13.4%)   | 923<br>(12.7%)                | 615<br>(13.9%)                   | 172<br>(16.1%)                 |            | 570<br>(13.8%)            | 1,140<br>(13.2%)      |            |
| South East                          | 520 (4.1%)         | 349 (4.8%)                    | 137<br>(3.1%)                    | 34 (3.2%)                      |            | 139<br>(3.4%)             | 381<br>(4.4%)         |            |
| Champlain                           | 1,335<br>(10.4%)   | 784<br>(10.8%)                | 453<br>(10.2%)                   | 98 (9.2%)                      |            | 460<br>(11.1%)            | 875<br>(10.1%)        |            |
| North Simcoe<br>Muskoka             | 518-522<br>(4.1%)  | 325-329<br>(4.5%)             | 170-174<br>(3.8-3.9%)            | 14-18 (1.3-<br>1.7%)           |            | 177-181<br>(4.3-<br>4.4%) | 338-342<br>(3.9-4.0%) |            |
| North East                          | 478 (3.7%)         | 301 (4.1%)                    | 146<br>(3.3%)                    | 31 (2.9%)                      |            | 157<br>(3.8%)             | 321<br>(3.7%)         |            |
| North West                          | 252 (2.0%)         | 157 (2.2%)                    | 69 (1.6%)                        | 26 (2.4%)                      |            | 62 (1.5%)                 | 190<br>(2.2%)         |            |
| Unknown                             | *                  | *                             | *                                | *                              |            | *                         | *                     |            |
| <b>Mental comorbidity</b>           | 4,127<br>(32.3%)   | 1,730<br>(23.7%)              | 1,810<br>(40.9%)                 | 587<br>(54.9%)                 | <0.001     |                           |                       |            |
| <b>Physical ADGs</b>                |                    |                               |                                  |                                |            |                           |                       |            |
| 0-5                                 | 7,287<br>(57.01%)  |                               |                                  |                                |            | 1,730<br>(41.9%)          | 5,557<br>(64.2%)      | <0.001     |
| 6-9                                 | 4,425<br>(34.62%)  |                               |                                  |                                |            | 1,810<br>(43.9%)          | 2,615<br>(30.2%)      |            |
| 10+                                 | 1,069<br>(8.36%)   |                               |                                  |                                |            | 587<br>(14.2%)            | 482<br>(5.6%)         |            |

\* denotes too few cases to report. Ranges provided in associated rows/columns in order to prevent re-identification of small cells as per ICES policy.

UPC: usual provider of care index

LHIN: Local Health Integration Network



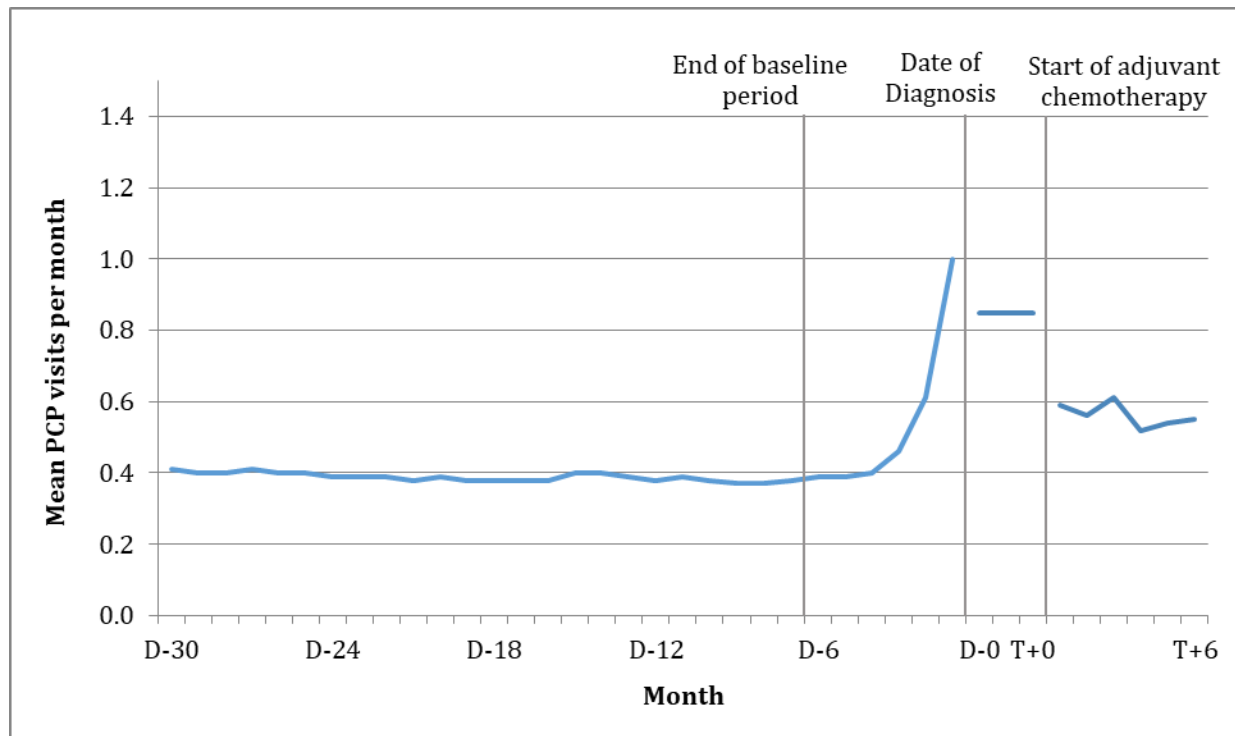

Figure 1. Mean PCP visits per month prior to diagnosis and during adjuvant chemotherapy

D[n]=number of months prior to diagnosis date

T[n]=number of months from start of adjuvant chemotherapy

Median number of days between date of diagnosis and start of adjuvant chemotherapy=91 days.

Table 2. Mean PCP visits (per 6 months) during baseline and treatment periods stratified by cohort characteristics

|                                     | Total<br>N= 12,781 | Mean (SD)/4*<br>baseline PCP<br>visits | P value | Mean (SD)<br>treatment PCP<br>visits | P value | Difference<br>(treatment –<br>baseline)<br>Mean (SD) | P value |
|-------------------------------------|--------------------|----------------------------------------|---------|--------------------------------------|---------|------------------------------------------------------|---------|
| Total                               |                    | 2.3 (2.5)                              |         | 3.4 (3.4)                            |         | 1 (3.3)                                              |         |
| <b>Age at diagnosis<br/>(years)</b> |                    |                                        | <0.0001 |                                      | <0.0001 |                                                      | 0.3662  |
| <40                                 | 1,102 (8.6%)       | 2.2 (2.2)                              |         | 3 (3.7)                              |         | 0.87 (3.6)                                           |         |
| 40-49                               | 3,481<br>(27.2%)   | 2.1 (2.3)                              |         | 3.1 (3.1)                            |         | 1 (3.1)                                              |         |
| 50-59                               | 4,225<br>(33.1%)   | 2.3 (2.6)                              |         | 3.3 (3.1)                            |         | 1 (3.2)                                              |         |
| 60-69                               | 3,045<br>(23.8%)   | 2.5 (2.5)                              |         | 3.6 (3.4)                            |         | 1 (3.4)                                              |         |
| 70-74                               | 607 (4.7%)         | 3.1 (2.6)                              |         | 4.2 (3.8)                            |         | 1 (3.3)                                              |         |
| >74                                 | 321 (2.5%)         | 3 (2.7)                                |         | 4.4 (4.9)                            |         | 1.3 (4.8)                                            |         |
| <b>Urban/rural<br/>Residence</b>    |                    |                                        | <0.0001 |                                      | <0.0001 |                                                      | <0.0001 |

|                                          | Total<br>N= 12,781 | Mean (SD)/4*<br>baseline PCP<br>visits | P value | Mean (SD)<br>treatment PCP<br>visits | P value     | Difference<br>(treatment –<br>baseline)<br>Mean (SD) | P value |
|------------------------------------------|--------------------|----------------------------------------|---------|--------------------------------------|-------------|------------------------------------------------------|---------|
| Urban                                    | 11,189<br>(87.5%)  | 2.4 (2.5)                              |         | 3.3 (3.3)                            |             | 0.89 (3.2)                                           |         |
| Rural                                    | 699 (5.5%)         | 2 (2.2)                                |         | 3.5 (3.6)                            |             | 1.5 (3.7)                                            |         |
| Rural-remote                             | 596 (4.7%)         | 1.7 (1.7)                              |         | 3.5 (3.8)                            |             | 1.8 (3.8)                                            |         |
| Rural-very remote                        | 292-297<br>(2.3%)  | 1.7 (1.9)                              |         | 4.7 (4.2)                            |             | 2.9 (4.3)                                            |         |
| Rural-unknown                            | <=5                | **                                     |         | **                                   |             | **                                                   |         |
| Unknown                                  | <=5                | **                                     |         | **                                   |             | **                                                   |         |
| <b>Immigration Status</b>                |                    |                                        | 0.0439  |                                      | 0.2578      |                                                      | 0.0079  |
| Long-term residents                      | 11,075<br>(86.7%)  | 2.3 (2.5)                              |         | 3.4 (3.4)                            |             | 1 (3.3)                                              |         |
| Immigrants                               | 1,706<br>(13.3%)   | 2.5 (2.2)                              |         | 3.3 (3.1)                            |             | 0.82 (3.1)                                           |         |
| <b>Neighbourhood<br/>Income Quintile</b> |                    |                                        | 0.0028  |                                      | <0.000<br>1 |                                                      | 0.2246  |
| 1 (lowest)                               | 2,020<br>(15.8%)   | 2.4 (2.3)                              |         | 3.5 (3.6)                            |             | 1.1 (3.5)                                            |         |
| 2                                        | 2,384<br>(18.7%)   | 2.3 (2.4)                              |         | 3.5 (3.4)                            |             | 1.1 (3.3)                                            |         |
| 3                                        | 2,523<br>(19.7%)   | 2.4 (2.5)                              |         | 3.5 (3.3)                            |             | 1 (3.2)                                              |         |
| 4                                        | 2,819<br>(22.1%)   | 2.3 (2.4)                              |         | 3.4 (3.3)                            |             | 1 (3.3)                                              |         |
| 5 (highest)                              | 2,994<br>(23.4%)   | 2.2 (2.7)                              |         | 3.1 (3.3)                            |             | 0.91 (3.3)                                           |         |
| Unknown                                  | 41 (0.3%)          | 2.2 (1.5)                              |         | 3.9 (3.5)                            |             | 1.7 (3.2)                                            |         |
| <b>Stage</b>                             |                    |                                        | 0.7891  |                                      | 0.8486      |                                                      | 0.5796  |
| Stage I                                  | 2,839<br>(22.2%)   | 2.3 (2.2)                              |         | 3.4 (3.2)                            |             | 1.1 (3.2)                                            |         |
| Stage II                                 | 7,311<br>(57.2%)   | 2.4 (2.4)                              |         | 3.3 (3.3)                            |             | 0.99 (3.2)                                           |         |
| Stage III                                | 2,631<br>(20.6%)   | 2.3 (2.9)                              |         | 3.4 (3.7)                            |             | 1 (3.7)                                              |         |
| <b>Baseline Continuity of<br/>Care</b>   |                    |                                        | <0.0001 |                                      | <0.000<br>1 |                                                      | <0.0001 |
| 0 visit                                  | 800 (6.3%)         | 0 (0)                                  |         | 2.1 (2.7)                            |             | 2.1 (2.7)                                            |         |
| 1-2 visits                               | 1,536<br>(12.0%)   | 0.39 (0.12)                            |         | 2.1 (2.4)                            |             | 1.8 (2.4)                                            |         |
| UPC<=0.75 (low)                          | 3,914<br>(30.6%)   | 2.8 (2.5)                              |         | 3.6 (3.5)                            |             | 0.74 (3.6)                                           |         |

|                                            | Total<br>N= 12,781 | Mean (SD)/4*<br>baseline PCP<br>visits | P value | Mean (SD)<br>treatment PCP<br>visits | P value | Difference<br>(treatment –<br>baseline)<br>Mean (SD) | P value |
|--------------------------------------------|--------------------|----------------------------------------|---------|--------------------------------------|---------|------------------------------------------------------|---------|
| UPC>0.75 (high)                            | 6,531<br>(51.1%)   | 2.8 (2.5)                              |         | 3.7 (3.4)                            |         | 0.88 (3.3)                                           |         |
| <b>Primary Care Practice<br/>Model</b>     |                    |                                        | <0.0001 |                                      | <0.0001 |                                                      | <0.0001 |
| Straight FFS                               | 1,887<br>(14.8%)   | 2.1 (2.7)                              |         | 3.2 (3.4)                            |         | 1.1 (3.4)                                            |         |
| Enhanced FFS                               | 6,281<br>(49.1%)   | 2.7 (2.7)                              |         | 3.6 (3.4)                            |         | 0.88 (3.3)                                           |         |
| Capitation                                 | 2,235<br>(17.5%)   | 2.1 (2.1)                              |         | 3 (3.1)                              |         | 0.85 (3.1)                                           |         |
| Team-based<br>capitation                   | 2,206<br>(17.3%)   | 1.7 (1.9)                              |         | 3.2 (3.3)                            |         | 1.5 (3.4)                                            |         |
| Other                                      | 172 (1.3%)         | 1.3 (1.6)                              |         | 2.4 (3.2)                            |         | 1.1 (3)                                              |         |
| <b>Regional health<br/>district (LHIN)</b> |                    |                                        | <0.0001 |                                      | <0.0001 |                                                      | <0.0001 |
| Erie St. Clair                             | 713 (5.6%)         | 2.4 (2.5)                              |         | 3.4 (3.7)                            |         | 1.1 (3.5)                                            |         |
| South West                                 | 992 (7.8%)         | 2.1 (2)                                |         | 3.8 (3.2)                            |         | 1.8 (3.2)                                            |         |
| Waterloo Wellington                        | 654 (5.1%)         | 1.7 (1.8)                              |         | 2.7 (3)                              |         | 1 (2.7)                                              |         |
| Hamilton Niagara<br>Haldimand Brant        | 1,468<br>(11.5%)   | 2.1 (2.2)                              |         | 3.5 (3.1)                            |         | 1.4 (3)                                              |         |
| Central West                               | 543 (4.2%)         | 3 (2.4)                                |         | 3.5 (3.1)                            |         | 0.46 (3.1)                                           |         |
| Mississauga Halton                         | 750 (5.9%)         | 2.6 (2.4)                              |         | 2.8 (3.1)                            |         | 0.21 (3)                                             |         |
| Toronto Central                            | 1,061 (8.3%)       | 2.5 (3.2)                              |         | 3 (3.3)                              |         | 0.47 (3.2)                                           |         |
| Central                                    | 1,784<br>(14.0%)   | 2.7 (2.7)                              |         | 3.2 (3)                              |         | 0.52 (3.3)                                           |         |
| Central East                               | 1,710<br>(13.4%)   | 2.6 (2.4)                              |         | 3.4 (3.5)                            |         | 0.85 (3.4)                                           |         |
| South East                                 | 520 (4.1%)         | 2 (2.1)                                |         | 3.1 (3.5)                            |         | 1.2 (3.5)                                            |         |
| Champlain                                  | 1,335<br>(10.4%)   | 2.1 (2.6)                              |         | 3.9 (3.3)                            |         | 1.8 (2.9)                                            |         |
| North Simcoe<br>Muskoka                    | 518-522<br>(4.1%)  | 2.3 (2.9)                              |         | 3 (2.7)                              |         | 0.7 (3.5)                                            |         |
| North East                                 | 478 (3.7%)         | 2 (1.9)                                |         | 3.1 (3.9)                            |         | 1.1 (3.6)                                            |         |
| North West                                 | 252 (2.0%)         | 1.9 (1.8)                              |         | 4.4 (5.6)                            |         | 2.5 (5.6)                                            |         |
| Unknown                                    | <=5                | **                                     |         | **                                   |         | **                                                   |         |
| <b>Physical comorbidities</b>              |                    |                                        | <0.0001 |                                      | <0.0001 |                                                      | <0.0001 |
| 0-5 physical ADGs<br>(low)                 | 7,287<br>(57.1%)   | 1.4 (1.7)                              |         | 2.8 (3)                              |         | 1.4 (3)                                              |         |
| 6-9 physical ADGs<br>(medium)              | 4,425<br>(34.6%)   | 3.2 (2.3)                              |         | 3.8 (3.4)                            |         | 0.66 (3.4)                                           |         |

|                              | Total<br>N= 12,781 | Mean (SD)/4*<br>baseline PCP<br>visits | P value | Mean (SD)<br>treatment PCP<br>visits | P value | Difference<br>(treatment –<br>baseline)<br>Mean (SD) | P value |
|------------------------------|--------------------|----------------------------------------|---------|--------------------------------------|---------|------------------------------------------------------|---------|
| 10+ physical ADGs<br>(high)  | 1,069 (8.4%)       | 5.6 (3.4)                              |         | 5.3 (4.2)                            |         | -0.2 (4)                                             |         |
| <b>Mental health history</b> |                    |                                        | <0.0001 |                                      | <0.0001 |                                                      | <0.0001 |
| Yes                          | 4,127<br>(32.3%)   | 3.5 (3.1)                              |         | 4.1 (3.8)                            |         | 0.58 (3.7)                                           |         |
| No                           | 8,654<br>(67.7%)   | 1.8 (1.9)                              |         | 3 (3.1)                              |         | 1.2 (3.1)                                            |         |

\* mean baseline PCP visits divided by 4 in order to obtain 6-month visit rate

\*\* denotes too few cases to report

UPC: usual provider of care index

LHIN: Local Health Integration Network

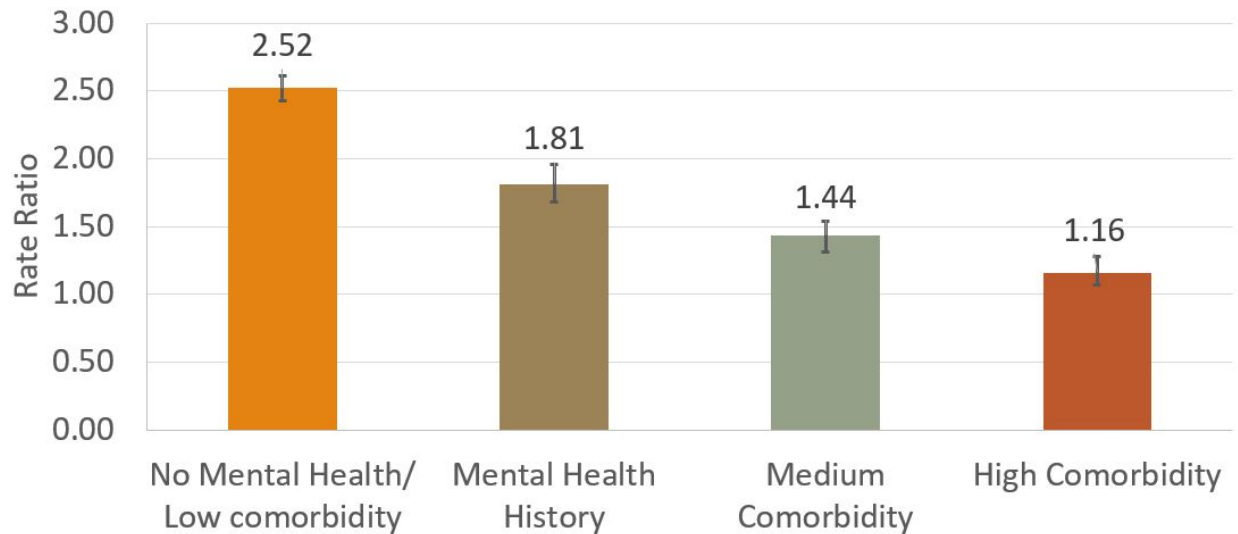

Figure 2. Relative increase in PCP visit rates from baseline to treatment periods (rate ratio) by mental health and physical comorbidity groups – adjusted for: age, immigration status, income, rurality, regional health district (LHIN), continuity of primary care, primary care enrollment model

Table 3. Top 5 diagnostic codes for PCP visits during baseline and treatment periods

| Rank  | PCP Visits (Baseline period) |               | PCP Visits (Treatment period) |                |
|-------|------------------------------|---------------|-------------------------------|----------------|
|       | Dx code                      | N (%)         | Dx code                       | N (%)          |
| Total |                              | 119294        |                               | 42748          |
| 1     | Hypertension                 | 10951 (9.18%) | Breast cancer (Female)        | 14097 (32.98%) |
| 2     | Anxiety                      | 8533 (7.15%)  | Anxiety                       | 2686 (6.28%)   |

1  
2  
3  
4  
5  
6  
7  
8  
9  
10  
11  
12  
13  
14  
15  
16  
17  
18  
19  
20  
21  
22  
23  
24  
25  
26  
27  
28  
29  
30  
31  
32  
33  
34  
35  
36  
37  
38  
39  
40  
41  
42  
43  
44  
45  
46  
47  
48  
49  
50  
51  
52  
53  
54  
55  
56  
57  
58  
59  
60

|   |                           |              |                                                |              |
|---|---------------------------|--------------|------------------------------------------------|--------------|
| 3 | Annual health examination | 5606 (4.70%) | Hypertension                                   | 1757 (4.11%) |
| 4 | Common cold               | 4844 (4.06%) | Other ill-defined conditions, general symptoms | 1429 (3.34%) |
| 5 | Diabetes                  | 4696 (3.94%) | Common cold                                    | 1301 (3.04%) |

Confidential

## Appendix A. Data sources used to obtain data elements for variable creation

| Data Source                                                                                                    | Data Elements                                                                                                                                               |
|----------------------------------------------------------------------------------------------------------------|-------------------------------------------------------------------------------------------------------------------------------------------------------------|
| Ontario Cancer Registry (OCR)                                                                                  | Date of breast cancer diagnosis, age at diagnosis, sex, other cancer diagnoses, cancer stage                                                                |
| Registered Persons Database (RPDB)                                                                             | Postal code at time of diagnosis, LHIN                                                                                                                      |
| 2006 Statistics Canada Census & Postal code conversion file plus, version 5C                                   | Rurality, Neighborhood income quintile                                                                                                                      |
| Immigration Refugee and Citizenship Canada (IRCC) database                                                     | Immigration status                                                                                                                                          |
| Ontario Health Insurance Plan (OHIP)                                                                           | Number of PCP visits (billed encounters) total and per provider, reasons for visits, diagnostic codes, chemotherapy receipt, start of adjuvant chemotherapy |
| ICES Physician Database                                                                                        | Physician specialty                                                                                                                                         |
| Client Agency Program Enrollment database (CAPE) & Corporate Provider Database                                 | Primary care enrollment model                                                                                                                               |
| Canadian Institute for Health Information: Discharge Abstract Database (DAD) & Same Day Surgery (SDS) database | Diagnosis codes, surgery receipt                                                                                                                            |
| Cancer Activity Level Reporting (ALR) database                                                                 | Date of radiotherapy receipt                                                                                                                                |

## Appendix B. Relative differences in PCP visit rates— adjusted difference-in-difference model estimates.

|                              | Exponentiated estimate (95% CI) |
|------------------------------|---------------------------------|
| Intercept                    | 0.01 (0.01-0.01)                |
| Treatment period             | 2.52 (2.43-2.61)                |
| Mental Health History        | 1.49 (1.44-1.54)                |
| No Mental Health History     | reference                       |
| Period*Mental Health History | 0.72 (0.69-0.75)                |
| 0-5 ADGs                     | reference                       |
| 6-9 ADGs                     | 1.82 (1.76-1.88)                |
| 10+ ADGs                     | 2.97 (2.83-3.12)                |
| Period*(6-9 ADGs)            | 0.57 (0.54-0.59)                |
| Period*(10+ ADGs)            | 0.46 (0.44-0.49)                |
| Age <40 years                | 0.94 (0.90-0.99)                |

|                                         |                  |
|-----------------------------------------|------------------|
| Age 40-49 years                         | 0.94 (0.91-0.98) |
| Age 50-59 years                         | Reference        |
| Age 60-69 years                         | 1.04 (1.01-1.08) |
| Age 70-74 years                         | 1.13 (1.07-1.18) |
| Age >74 years                           | 1.20 (1.11-1.29) |
| Non-immigrant                           | Reference        |
| Immigrant                               | 1.03 (1.00-1.07) |
| Income quintile 1                       | Reference        |
| Income quintile 2                       | 0.99 (0.95-1.03) |
| Income quintile 3                       | 0.99 (0.95-1.03) |
| Income quintile 4                       | 0.97 (0.93-1.01) |
| Income quintile 5                       | 0.93 (0.89-0.97) |
| Urban                                   | Reference        |
| Rural                                   | 0.99 (0.94-1.05) |
| Rural-remote                            | 0.96 (0.90-1.03) |
| Rural-very remote                       | 1.20 (1.10-1.31) |
| LHIN 1 Erie St. Clair                   | 1.06 (0.98-1.14) |
| LHIN 2 South West                       | 1.11 (1.03-1.19) |
| LHIN 3 Waterloo Wellington              | 0.97 (0.90-1.05) |
| LHIN 4 Hamilton Niagara Haldimand Brant | 1.09 (1.02-1.17) |
| LHIN 5 Central West                     | 1.10 (1.02-1.19) |
| LHIN 6 Mississauga Halton               | 1.05 (0.97-1.13) |
| LHIN 7 Toronto Central                  | reference        |
| LHIN 8 Central                          | 1.05 (0.98-1.12) |
| LHIN 9 Central East                     | 1.06 (0.99-1.14) |
| LHIN 10 South East                      | 1.10 (1.01-1.20) |
| LHIN 11 Champlain                       | 1.12 (1.04-1.21) |
| LHIN 12 North Simcoe Muskoka            | 1.08 (0.98-1.19) |
| LHIN 13 North East                      | 1.03 (0.94-1.13) |
| LHIN 14 North West                      | 1.14 (1.00-1.30) |
| Continuity 0 visits                     | 0.25 (0.23-0.28) |
| Continuity 1-2 visits                   | 0.39 (0.38-0.41) |
| Continuity UPC <=0.75                   | 0.95 (0.93-0.98) |
| Continuity UPC >0.75                    | Reference        |
| PC model capitation                     | 0.89 (0.85-0.93) |
| PC model enhanced FFS                   | 1.00 (0.96-1.04) |
| PC model team-based capitation          | 0.87 (0.83-0.92) |
| PC model other                          | 0.74 (0.65-0.83) |
| PC model straight FFS                   | reference        |

1  
2  
3  
4  
5  
6  
7  
8  
9  
10  
11  
12  
13  
14  
15  
16  
17  
18  
19  
20  
21  
22  
23  
24  
25  
26  
27  
28  
29  
30  
31  
32  
33  
34  
35  
36  
37  
38  
39  
40  
41  
42  
43  
44  
45  
46  
47  
48  
49  
50  
51  
52  
53  
54  
55  
56  
57  
58  
59  
60

Confidential



STROBE Statement—Checklist of items that should be included in reports of *cohort studies*

|                              | Item No | Recommendation                                                                                                                                                                                                                                                                                                                                                                                                                              |
|------------------------------|---------|---------------------------------------------------------------------------------------------------------------------------------------------------------------------------------------------------------------------------------------------------------------------------------------------------------------------------------------------------------------------------------------------------------------------------------------------|
| <b>Title and abstract</b>    | 1       | (a) Indicate the study's design with a commonly used term in the title or the abstract <a href="#">page 1</a><br>(b) Provide in the abstract an informative and balanced summary of what was done and what was found <a href="#">page 2</a>                                                                                                                                                                                                 |
| <b>Introduction</b>          |         |                                                                                                                                                                                                                                                                                                                                                                                                                                             |
| Background/rationale         | 2       | Explain the scientific background and rationale for the investigation being reported <a href="#">Introduction section page 3-4</a>                                                                                                                                                                                                                                                                                                          |
| Objectives                   | 3       | State specific objectives, including any prespecified hypotheses <a href="#">End of Introduction Section page 4</a>                                                                                                                                                                                                                                                                                                                         |
| <b>Methods</b>               |         |                                                                                                                                                                                                                                                                                                                                                                                                                                             |
| Study design                 | 4       | Present key elements of study design early in the paper <a href="#">Study Design page 4</a>                                                                                                                                                                                                                                                                                                                                                 |
| Setting                      | 5       | Describe the setting, locations, and relevant dates, including periods of recruitment, exposure, follow-up, and data collection <a href="#">Methods page 4-5</a>                                                                                                                                                                                                                                                                            |
| Participants                 | 6       | (a) Give the eligibility criteria, and the sources and methods of selection of participants. Describe methods of follow-up <a href="#">Methods page 4-5</a><br>(b) For matched studies, give matching criteria and number of exposed and unexposed <a href="#">N/A</a>                                                                                                                                                                      |
| Variables                    | 7       | Clearly define all outcomes, exposures, predictors, potential confounders, and effect modifiers. Give diagnostic criteria, if applicable <a href="#">Variable and data sources page 5-6</a>                                                                                                                                                                                                                                                 |
| Data sources/<br>measurement | 8*      | For each variable of interest, give sources of data and details of methods of assessment (measurement). Describe comparability of assessment methods if there is more than one group <a href="#">Variable and data sources page 5-6; Appendix A</a>                                                                                                                                                                                         |
| Bias                         | 9       | Describe any efforts to address potential sources of bias <a href="#">Methods page 5-6</a>                                                                                                                                                                                                                                                                                                                                                  |
| Study size                   | 10      | Explain how the study size was arrived at <a href="#">N/A population-based cohort</a>                                                                                                                                                                                                                                                                                                                                                       |
| Quantitative variables       | 11      | Explain how quantitative variables were handled in the analyses. If applicable, describe which groupings were chosen and why <a href="#">Methods page 5-6</a>                                                                                                                                                                                                                                                                               |
| Statistical methods          | 12      | (a) Describe all statistical methods, including those used to control for confounding <a href="#">Page 6</a><br>(b) Describe any methods used to examine subgroups and interactions <a href="#">Page 6</a><br>(c) Explain how missing data were addressed <a href="#">Page 6 Results</a><br>(d) If applicable, explain how loss to follow-up was addressed <a href="#">N/A</a><br>(e) Describe any sensitivity analyses <a href="#">N/A</a> |
| <b>Results</b>               |         |                                                                                                                                                                                                                                                                                                                                                                                                                                             |
| Participants                 | 13*     | (a) Report numbers of individuals at each stage of study—eg numbers potentially eligible, examined for eligibility, confirmed eligible, included in the study, completing follow-up, and analysed <a href="#">Results page 6</a><br>(b) Give reasons for non-participation at each stage <a href="#">N/A</a><br>(c) Consider use of a flow diagram <a href="#">Considered</a>                                                               |
| Descriptive data             | 14*     | (a) Give characteristics of study participants (eg demographic, clinical, social) and information on exposures and potential confounders <a href="#">Results page 6, table 1</a><br>(b) Indicate number of participants with missing data for each variable of interest <a href="#">Results page 6, table 1</a><br>(c) Summarise follow-up time (eg, average and total amount) <a href="#">Methods page 5</a>                               |
| Outcome data                 | 15*     | Report numbers of outcome events or summary measures over time <a href="#">Figure 1, Table 2</a>                                                                                                                                                                                                                                                                                                                                            |

|    |                          |    |                                                                                                                                                                                                                                                         |
|----|--------------------------|----|---------------------------------------------------------------------------------------------------------------------------------------------------------------------------------------------------------------------------------------------------------|
| 1  | Main results             | 16 | (a) Give unadjusted estimates and, if applicable, confounder-adjusted estimates and their precision (eg, 95% confidence interval). Make clear which confounders were adjusted for and why they were included <a href="#">Results page 7-8, Figure 2</a> |
| 2  |                          |    | (b) Report category boundaries when continuous variables were categorized <a href="#">Methods page 5</a>                                                                                                                                                |
| 3  |                          |    | (c) If relevant, consider translating estimates of relative risk into absolute risk for a meaningful time period <a href="#">Considered</a>                                                                                                             |
| 4  | Other analyses           | 17 | Report other analyses done—eg analyses of subgroups and interactions, and sensitivity analyses <a href="#">N/A</a>                                                                                                                                      |
| 5  | <b>Discussion</b>        |    |                                                                                                                                                                                                                                                         |
| 6  | Key results              | 18 | Summarise key results with reference to study objectives <a href="#">Interpretation page 8</a>                                                                                                                                                          |
| 7  | Limitations              | 19 | Discuss limitations of the study, taking into account sources of potential bias or imprecision. Discuss both direction and magnitude of any potential bias <a href="#">Interpretation page 9</a>                                                        |
| 8  | Interpretation           | 20 | Give a cautious overall interpretation of results considering objectives, limitations, multiplicity of analyses, results from similar studies, and other relevant evidence <a href="#">Interpretation page 8-9</a>                                      |
| 9  | Generalisability         | 21 | Discuss the generalisability (external validity) of the study results <a href="#">Interpretation page 9</a>                                                                                                                                             |
| 10 | <b>Other information</b> |    |                                                                                                                                                                                                                                                         |
| 11 | Funding                  | 22 | Give the source of funding and the role of the funders for the present study and, if applicable, for the original study on which the present article is based <a href="#">Funding statement page 1.</a>                                                 |

\*Give information separately for exposed and unexposed groups.

**Note:** An Explanation and Elaboration article discusses each checklist item and gives methodological background and published examples of transparent reporting. The STROBE checklist is best used in conjunction with this article (freely available on the Web sites of PLoS Medicine at <http://www.plosmedicine.org/>, Annals of Internal Medicine at <http://www.annals.org/>, and Epidemiology at <http://www.epidem.com/>). Information on the STROBE Initiative is available at <http://www.strobe-statement.org>.
